# Supplementary material for: PROTACs and Building Blocks: The 2D Chemical Space in Very Early Drug Discovery
Source: PubMed Central journal article supplement (PMC7865272; doi:10.3390/molecules26030672), 2021-01-28
Supplement: molecules-26-00672-s001.pdf [file molecules-26-00672-s001.pdf]

# PROTACs and building blocks: the 2D chemical space in very early drug discovery

Giulia Caron, Diego Garcia Jimenez and Giuseppe Ermondi\*

*Molecular Biotechnology and Health Sciences Dept., University of Torino, Via Quarello, 15, 10135 Torino, Italy*

*E-mail: giuseppe.ermondi@unito.it*

## Supporting Material

### Tables

Table S1. Descriptors, classification and definition

Table S2. Complete spectra of the E3 ligases and their ligands, used for degrader formation

Table S3. Complete spectra of the proteins of interest and their warheads, used for degrader formation

Table S4. PCA variance

Table S5. E3 ligand data

Table S6. Warhead data

Table S7. Linker data

Table S8. PROTAC data

Table S9. bRo5 data

Table S10. Pearson's Correlation Coefficients and p values for E3 ligands descriptors correlations

Table S11. Pearson's Correlation Coefficients and p values for warhead descriptors correlations

Table S12. Pearson's Correlation Coefficients and p values for linkers descriptors correlations

Table S13. Pearson's Correlation Coefficients and p values for PROTACs descriptors correlations

Table S14. Descriptors used in the paper and the additional count-base descriptors

Table S15. Additional descriptors correlated with hydrophobicity descriptors used in the paper (Pearson coefficient)

Table S16. Additional descriptors correlated with polarity descriptors used in the paper (Pearson coefficient)

Table S17. Additional descriptors which are not significantly or few correlated with descriptors used in the paper (Pearson coefficient)

## Figures

Figure S1. Databases overlap (PROTAC-DB in grey, PROTACpedia in yellow)

Figure S2. Investigated PROTAC chemical structures.

Figure S3. Box plots of the nonpolar descriptors for PROTACs and their building blocks with p-values obtained with an ANOVA analysis. A) MW, B) nC and C) NAR.nC and C) NAR.

Figure S4. Box plot of the polar descriptors for PROTACs and their building blocks obtained with p-values obtained with an ANOVA analysis. A) TPSA, B) nHAcc and C) nHDon

Figure S5. Box plot of the Kier's flexibility index (PHI) with p-values obtained with an ANOVA analysis.

Table S1. Descriptors, classification and definition

| <b>Descriptor name</b> | <b>Classification</b>                              | <b>Definition</b>                                                         |
|------------------------|----------------------------------------------------|---------------------------------------------------------------------------|
| <b>MW</b>              | alvaDesc: Constitutional indices/Basic descriptors | <i>Molecular weight</i>                                                   |
| <b>nC</b>              | alvaDesc: Constitutional indices/Basic descriptors | <i>Number of carbon atoms</i>                                             |
| <b>NAR</b>             | DataWarrior: Counts                                | <i>Number of aromatic rings</i>                                           |
| <b>PHI</b>             | alvaDesc: Topological indices/Path/walk indices    | <i>Kier flexibility index</i>                                             |
| <b>TPSA</b>            | alvaDesc: Molecular properties/Basic descriptors   | <i>Topological polar surface area using N, O, S, P polar contribution</i> |
| <b>nHAcc</b>           | alvaDesc: Functional group count/Basic descriptors | <i>Number of acceptor atoms for H-bonds (N, O, F)</i>                     |
| <b>nHDon</b>           | alvaDesc: Functional group count/Basic descriptors | <i>Number of donor atoms for H-bonds (N, O)</i>                           |

Table S2. Complete spectra of the E3 ligases and their ligands, used for degrader formation.

| <i>FAMILY/CLASS</i> | <i>E3 LIGASE GENE NAME</i> | <i>E3 LIGASE UNIPROT ID</i> | <i>N° E3 LIGANDS (DEFINED NAME)</i>                                 | <i>N° E3 LIGANDS (UNDEFINED NAME)</i> | <i>TOTAL N° OF DEGRADERS</i> |
|---------------------|----------------------------|-----------------------------|---------------------------------------------------------------------|---------------------------------------|------------------------------|
| IAPs                | <b>cIAP1/BIRC2</b>         | Q13490                      | BESTATIN, MV1, LCL 161 DERIVATIVE, GDC-0152 (4)                     | 3                                     | 7                            |
|                     | <b>cIAP2/BIRC3</b>         | Q13489                      | LCL 161 DERIVATIVE, GDC-0152 (2)                                    | 0                                     | 2                            |
|                     | <b>IAP (unspecified)</b>   | -                           | -                                                                   | 4                                     | 4                            |
|                     | <b>XIAP</b>                | P98170                      | MV1, LCL 161 DERIVATIVE, GDC-0152 (3)                               | 6                                     | 10                           |
| CRBN                | <b>CRBN</b>                | Q965W2                      | POMALIDOMIDE, THALIDOMIDE, LENALIDOMIDE, S-LENALIDOMIDE, TD-106 (5) | 4                                     | 9                            |
| bHLH                | <b>AhR</b>                 | P35869                      | BETA-NAPHTHOFLAVONE, ALPHA-NAPHTHOFLAVONE, ITE (3)                  | 0                                     | 3                            |
| DCAF                | <b>DCAF15</b>              | Q66K64                      | -                                                                   | 1                                     | 1                            |
| SWIB/MDM2           | <b>MDM2</b>                | Q00987                      | NUTLIN-3, RG7388 RG7112, NUTLIN-3A, NUTLIN-3B (5)                   | 0                                     | 5                            |
| RING-C_RNF114       | <b>RNF114</b>              | Q9Y508                      | NIMBOLIDE (1)                                                       | 0                                     | 1                            |
| RING-HC_RNF4        | <b>RNF4</b>                | P78317                      | CCW 16 (1)                                                          | 0                                     | 1                            |
| VHL                 | <b>VHL</b>                 | P40337                      | VH032, VH298, VH101, VHL-1, VL285 (5)                               | 22                                    | 27                           |

Table S3. Complete spectra of the proteins of interest and their warheads, used for degrader formation.

| FAMILY/CLASS                          | POI GENE NAME | POI UNIPROT ID | N° WARHEADS (DEFINED NAME)                                                                      | N° WARHEADS (UNDEFINED NAME) | TOTAL N° OF DEGRADERS |
|---------------------------------------|---------------|----------------|-------------------------------------------------------------------------------------------------|------------------------------|-----------------------|
| Nuclear hormone receptor NR3          | AR            | P10275         | ENZALUTAMIDE, ARN-509, BICALUTAMIDE, DHT (4)                                                    | 15                           | 19                    |
|                                       | ESR1/ESR2     | P03372/Q92731  | RALOXIFENE, AFIMOXIFENE, TAMOXIFEN, BAZEDOXIFENE, LASOFOXIFENE, ESTRONE, ESTRADIOL, AZD9496 (8) | 0                            | 8                     |
| Bromodomain and extra-terminal domain | BRD2          | P25440         | JQ1, QCA276, OTX-015, HJB97, BETI-211, I-BET726 (6)                                             | 1                            | 7                     |
|                                       | BRD3          | Q15059         | JQ1, QCA276, OTX-015, HJB97, BETI-211, I-BET726 (6)                                             | 1                            | 7                     |
|                                       | BRD4          | O60885         | JQ1, QCA276, OTX-015, BI2536, GSK-39, ABBV-075, HJB97, BETI-211, I-BET726 (9)                   | 4                            | 13                    |
| Bromodomain-containing protein        | BRD7          | Q9NPI1         | BI-7273, BI-9564, GSK-39 (3)                                                                    | 0                            | 3                     |
|                                       | BRD9          | Q9H8M2         | BI-7273, BI-9564, GSK-39 (3)                                                                    | 0                            | 3                     |
| CDC2/CDKX                             | CDK1          | P06493         | TMX-2039, TMX-3013, TMX-3010, TMX-3012 (4)                                                      | 0                            | 4                     |
|                                       | CDK2          | P24941         | AT-7519, FN-1501, TMX-2039, TMX-3013, TMX-3010, TMX-3012 (6)                                    | 0                            | 6                     |
|                                       | CDK4          | P11802         | PALBOCICLIB, ABEMACICLIB, RIBOCICLIB, TMX-2039, TMX-3013, TMX-3010, TMX-3012 (7)                | 0                            | 7                     |
|                                       | CDK5          | Q00535         | TMX-2039, TMX-3013, TMX-3010, TMX-3012 (4)                                                      | 0                            | 4                     |
|                                       | CDK6          | Q00534         | PALBOCICLIB, ABEMACICLIB, RIBOCICLIB, TMX-2039, TMX-3013, TMX-3010, TMX-3012 (7)                | 0                            | 7                     |
|                                       | CDK7          | P50613         | TMX-2039, TMX-3010 (2)                                                                          | 0                            | 2                     |
|                                       | CDK8          | P49336         | JH-VIII-49 (1)                                                                                  | 0                            | 1                     |
|                                       | CDK9          | P50750         | WOGONIN, AT-7519, FN-1501, SNS-032, NVP-2, TMX-2039, TMX-3010 (7)                               | 1                            | 8                     |
| Bcl-2                                 | MCL1          | Q07820         | A-1210477 (1)                                                                                   | 2                            | 3                     |
| SWIB/MDM2                             | MDM2          | Q00987         | MI-1242, MI-1061, RG7112 (3)                                                                    | 0                            | 3                     |
| Sirtuin                               | SIRT2         | Q8IXJ6         | -                                                                                               | 0                            | 1                     |
| Poly (ADP-Ribose) Polymerase          | PARP1         | P09874         | NIRAPARIB, OLAPARIB, RUCAPARIB, VELIPARIB (4)                                                   | 0                            | 4                     |
|                                       | PARP2         | Q9UGN5         | VELIPARIB (1)                                                                                   | 0                            | 1                     |
|                                       | PARP3         | Q9Y6F1         | RUCAPARIB (1)                                                                                   | 0                            | 1                     |
| CRBN                                  | CRBN          | Q96SW2         | POMALIDOMIDE, THALIDOMIDE (2)                                                                   | 0                            | 2                     |
| PI3/PI4-kinase                        | PI3KALPHA     | P42336         | ZSTK474 (1)                                                                                     | 0                            | 1                     |
| Bcr-Abl                               | BCR-ABL       | Q16189         | BOSUTINIB, DASATINIB, IMATINIB, GNF-5, ASCIMINIB, PONATINIB, HG-7-85-01, ABL001 DERIVATIVE (8)  | 0                            | 8                     |
|                                       | BCR-ABL T315I | Q16189         | ASCIMINIB, PONATINIB (2)                                                                        | 1                            | 3                     |
| TEC                                   | BTK           | Q06187         | DESPROPENOYLBRUTINIB, SPEBRUTINIB, BOSUTINIB, CGI1746, RN486, IBRUTINIB (6)                     | 6                            | 12                    |
| Nuclear hormone receptor NR3          | ESRRA         | P11474         | -                                                                                               | 2                            | 2                     |
| Insulin receptor                      | ALK           | Q9UM73         | CERITINIB, BRIGATINIB A, BRIGATINIB B, BRIGATINIB C, TAE684 (5)                                 | 0                            | 5                     |
|                                       | ALK G1202R    | Q9UM73         | BRIGATINIB B (1)                                                                                | 0                            | 1                     |
|                                       | IGF-1R        | P08069         | RBX10080307 (1)                                                                                 | 1                            | 2                     |
| Aurora                                | AURKA         | O14965         | TAE684, CERITINIB (2)                                                                           | 0                            | 2                     |
| FAK                                   | FAK           | Q05397         | DEFACTINIB, CERITINIB, TAE684 (3)                                                               | 0                            | 1                     |
| Fes/fps                               | FER           | P16591         | TAE684, CERITINIB (2)                                                                           | 0                            | 1                     |
| S6 kinase                             | RP56KA1       | Q15418         | TAE684, CERITINIB (2)                                                                           | 0                            | 2                     |
| Histone deacetylase                   | HDAC1         | Q13547         | CI-994 (1)                                                                                      | 0                            | 1                     |
|                                       | HDAC2         | Q92769         | CI-994 (1)                                                                                      | 0                            | 1                     |
|                                       | HDAC3         | O15379         | CI-994 (1)                                                                                      | 0                            | 1                     |
|                                       | HDAC6         | Q9UBN7         | NEXTURASTAT A (1)                                                                               | 1                            | 2                     |
| RAF                                   | BRAF V600E    | P15056         | VEMURAFENIB, BI882370 (2)                                                                       | 0                            | 2                     |
|                                       | BRAF          | P15056         | RIGOSERTIB (1)                                                                                  | 0                            | 1                     |
| BTB domain containing domain (BTBD)   | BCL6          | P41182         | -                                                                                               | 0                            | 1                     |
| CSF-1/PDGF receptor                   | FLT3          | P36888         | QUIZARTINIB (1)                                                                                 | 0                            | 1                     |

|                                   |                  |                              |                                                                                       |   |    |
|-----------------------------------|------------------|------------------------------|---------------------------------------------------------------------------------------|---|----|
| EGF receptor                      | EGFR             | P00533                       | LAPATINIB, GEFITINIB, AFATINIB, B30, XTF-262, AZD-9291, JBJ-07-149, JBJ-04-125-02 (8) | 2 | 10 |
|                                   | EGFR L858R/T790M | P00533                       | XTF-262 (1)                                                                           | 0 | 1  |
|                                   | HER2             | P04626                       | LAPATINIB (1)                                                                         | 0 | 1  |
|                                   | EGFR L858R       | P00533                       | GEFITINIB, XTF-262 (2)                                                                | 2 | 2  |
| Tyr protein kinase                | C-Met            | P08581                       | FORETINIB, PHA665752 (2)                                                              | 0 | 2  |
| AXL/UFO                           | MERTK            | Q12866                       | FORETINIB (1)                                                                         | 0 | 1  |
| MAP kinase                        | P38alpha         | Q16539                       | FORETINIB, PH-797804 (2)                                                              | 0 | 2  |
|                                   | P38delta         | O15264                       | FORETINIB (1)                                                                         | 0 | 1  |
| TKL Ser/Thr protein kinase        | RIPK2            | O43353                       | FORETINIB (1)                                                                         | 2 | 3  |
| GCN5                              | GCN5             | Q92830                       | GSK4027 (1)                                                                           | 0 | 1  |
|                                   | PCAF             | Q92831                       | GSK4027, GSK4028 (2)                                                                  | 0 | 2  |
| PI3/PI4-kinase                    | PI3Kalpha        | P42336                       | ZSTK474 (1)                                                                           | 0 | 1  |
| FKBP1                             | FKBP12           | P68106                       | RAPAMYCIN (1)                                                                         | 1 | 2  |
| FKBP1                             | FKBP12 F36V      | P68106                       | AP1867<br>ORTHO-AP1867 (2)                                                            | 0 | 2  |
| MAP kinase                        | MEK1             | Q02750                       | PD0325901 (1)                                                                         | 1 | 2  |
|                                   | MEK2             | P36507                       | PD0325901(1)                                                                          | 1 | 2  |
| STAT                              | STAT3            | P40763                       | SI-109 (1)                                                                            | 4 | 5  |
| Bcl-2                             | BCL2             | P10415                       | ABT-263 (1)                                                                           | 2 | 3  |
|                                   | BCL-xL           | Q07817                       | ABT-263, A-1155463 (2)                                                                | 1 | 3  |
| BTN/MOG                           | PD-L1            | Q9NZQ7                       | BMS-1198, BMS-8, BMS-1233 (3)                                                         | 0 | 3  |
| Cytochrome P450                   | CYP1B1           | Q16678                       | -                                                                                     | 1 | 1  |
| Eukaryotic initiation factor 4E   | eIF4E            | P06730                       | 7-BNGMP, FBN7GMP, BN7GDP, 7-(P-CHLOROBENZYL) GDP, GMP, GDP (6)                        | 0 | 6  |
| Fatty-acid binding protein (FABP) | CRABP-I          | P29762                       | ATRA (1)                                                                              | 0 | 1  |
|                                   | CRABP-II         | P29373                       | ATRA (1)                                                                              | 0 | 1  |
| PDE6D/unc-119                     | PDEdelta         | O43924                       | DELTAZINONE 1 (1)                                                                     | 0 | 3  |
| NR1                               | RAR (A, B, G)    | P10276,<br>P10826,<br>P13631 | CH55 (1)                                                                              | 0 | 1  |
| JAK                               | JAK1             | P23458                       | PYRIMIDINE 1, QUINOXALINE 2 (2)                                                       | 0 | 2  |
|                                   | JAK2             | O60674                       | PYRIMIDINE 1, QUINOXALINE 2 (2)                                                       | 0 | 2  |
| Bromodomain containing family     | PBRM1            | Q86U86                       | -                                                                                     | 0 | 1  |
| SNF2/RAD54 helicase               | SMARCA2          | P51531                       | -                                                                                     | 0 | 1  |
|                                   | SMARCA4          | P51532                       | -                                                                                     | 0 | 1  |
| Pelle                             | IRAK4            | Q9NWZ3                       | PF-06650833 (1)                                                                       | 9 | 10 |
| CDC5/Polo                         | PLK1             | P53350                       | BI2536, AZD1775 (2)                                                                   | 0 | 2  |
| AGC Ser/Thr protein kinase        | SGK3             | Q96BR1                       | 290-R, 308-R (2)                                                                      | 0 | 2  |
| WD repeat ESC                     | EED              | O75530                       | EED226 (1)                                                                            | 1 | 2  |
| RAC                               | AKT1             | P31749                       | GDC-0068 (1)                                                                          | 0 | 1  |
|                                   | AKT2             | P31751                       | GDC-0068 (1)                                                                          | 0 | 1  |
|                                   | AKT3             | Q9Y243                       | GDC-0068 (1)                                                                          | 0 | 1  |
| RAS                               | KRAS             | P01116                       | -                                                                                     | 2 | 2  |
|                                   | KRAS G12C        | P01116                       | MRTX849 (1)                                                                           | 1 | 2  |
| Tubulin                           | Tubulin (A,B,C)  | Q71U36,<br>P68363,<br>P0DPH7 | MMAE<br>COMBRETASTATIN A-4 (2)                                                        | 0 | 2  |
| Tau/MAP                           | Tau              | P10636                       | 18F-T807 (1)                                                                          | 0 | 1  |
| ADRM1                             | Rpn13            | Q16186                       | RA190 (1)                                                                             | 0 | 1  |
| SRC                               | Src              | P12931                       | PP2 (1)                                                                               | 0 | 1  |
| Glutamine amidotransferase        | NS3              | Q9NWL6                       | TELAPREVIR (1)                                                                        | 0 | 1  |
| CSF-1/PDGF receptor               | c-KIT            | P10721                       | SUNITINIB (1)                                                                         | 0 | 1  |
| I-kappa-B kinase                  | TBK1             | Q9UHD2                       | -                                                                                     | 1 | 1  |
| Non-receptor class 2              | SHP2             | Q06124                       | -                                                                                     | 1 | 1  |
| Synuclein                         | Alpha-syn        | P37840                       | BTA-1 (1)                                                                             | 2 | 3  |
| Insulin receptor                  | TrkA             | P04629                       | ENTRECTINIB, GNF-8625 (2)                                                             | 0 | 2  |
|                                   | TrkB             | Q16620                       | ENTRECTINIB, GNF-8625 (2)                                                             | 0 | 2  |
|                                   | TrkC             | Q16832                       | ENTRECTINIB, GNF-8625 (2)                                                             | 0 | 2  |

Table S4. PCA variance

|                   | <b>PC1</b> | <b>PC2</b> | <b>PC3</b> | <b>TOT</b> |
|-------------------|------------|------------|------------|------------|
| <b>E3 ligands</b> | 59.12      | 25.01      | 9.37       | 93.5       |
| <b>Linkers</b>    | 59.93      | 17.41      | 16.6       | 93.94      |
| <b>Warheads</b>   | 56.94      | 24.23      | 11.76      | 92.93      |
| <b>PROTACs</b>    | 59.21      | 17.39      | 12.46      | 89.06      |

Table S5. E3 ligand data

| Name  | Mean | Std.dev. | Maximum | Minimum |
|-------|------|----------|---------|---------|
| MW    | 462  | 111      | 728     | 240     |
| nC    | 24   | 6        | 38      | 12      |
| NAR   | 2    | 0.7      | 3       | 1       |
| PHI   | 8    | 2        | 12      | 3       |
| nHDon | 3    | 1        | 5       | 0       |
| nHAcc | 8    | 2        | 11      | 2       |
| TPSA  | 113  | 34       | 193     | 30      |

Table S6. Warhead data

| Name  | Mean | Std.dev. | Maximum | Minimum |
|-------|------|----------|---------|---------|
| MW    | 479  | 127      | 1035    | 240     |
| nC    | 24   | 7        | 52      | 10      |
| NAR   | 3    | 1        | 6       | 0       |
| PHI   | 7    | 3        | 22      | 2       |
| nHDon | 3    | 2        | 8       | 0       |
| nHAcc | 8    | 3        | 21      | 2       |
| TPSA  | 109  | 45       | 279     | 12      |

Table S7. Linker data

| Name  | Mean | Std.dev. | Maximum | Minimum |
|-------|------|----------|---------|---------|
| MW    | 215  | 83       | 556     | 16      |
| nC    | 11   | 4        | 25      | 1       |
| NAR   | 0    | 0.5      | 2       | 0       |
| PHI   | 9    | 5        | 33      | 0       |
| nHDon | 1    | 1        | 5       | 0       |
| nHAcc | 4    | 2        | 13      | 0       |
| TPSA  | 55   | 29       | 158     | 0       |

Table S8. PROTAC data

| Name  | Mean | Std.dev. | Maximum | Minimum |
|-------|------|----------|---------|---------|
| MW    | 984  | 174      | 1963    | 534     |
| nC    | 50   | 9        | 96      | 28      |
| NAR   | 4.7  | 1        | 9       | 1       |
| PHI   | 18   | 5        | 42      | 7       |
| nHDon | 4    | 2        | 11      | 1       |
| nHAcc | 18   | 3        | 38      | 9       |
| TPSA  | 242  | 44       | 460     | 115     |



Table S9: bRo5 data

| <b>Name</b>  | <b>Mean</b> | <b>Std.dev.</b> | <b>Maximum</b> | <b>Minimum</b> |
|--------------|-------------|-----------------|----------------|----------------|
| <b>MW</b>    | 765.300     | 127.11998       | 1202.840       | 504.720        |
| <b>nC</b>    | 39.327      | 8.22889         | 62             | 20             |
| <b>NAR</b>   | 2.058       | 1.893           | 6              | 0              |
| <b>PHI</b>   | 14.222      | 4.63463         | 33.567         | 7.329          |
| <b>nHDon</b> | 3.423       | 1.62512         | 8              | 0              |
| <b>nHAcc</b> | 13.288      | 3.46034         | 23             | 4              |
| <b>TPSA</b>  | 177.451     | 44.98033        | 278.800        | 42.680         |

Table S10. Pearson's Correlation Coefficients and p values for E3 ligand descriptor correlations.

**E2Ligands**

|              |                            |                            |                          |                            |                            |                            |           |
|--------------|----------------------------|----------------------------|--------------------------|----------------------------|----------------------------|----------------------------|-----------|
| <b>TPSA</b>  | 1.00                       |                            |                          |                            |                            |                            |           |
| <b>nHAcc</b> | 0.85<br><i>p &lt; .001</i> | 1.00                       |                          |                            |                            |                            |           |
| <b>nHDon</b> | 0.69<br><i>p &lt; .001</i> | 0.63<br><i>p &lt; .001</i> | 1.00                     |                            |                            |                            |           |
| <b>PHI</b>   | 0.50<br><i>p &lt; .001</i> | 0.70<br><i>p &lt; .001</i> | 0.39<br><i>6.77E-04</i>  | 1.00                       |                            |                            |           |
| <b>NAR</b>   | 0.11<br><i>0.359</i>       | 0.065<br><i>0.590</i>      | -0.30<br><i>1.23E-02</i> | 0.28<br><i>2.02E-02</i>    | 1.00                       |                            |           |
| <b>nC</b>    | 0.32<br><i>5.95E-03</i>    | 0.55<br><i>p &lt; .001</i> | 0.11<br><i>3.83E-01</i>  | 0.89<br><i>p &lt; .001</i> | 0.45<br><i>p &lt; .001</i> | 1.00                       |           |
| <b>MW</b>    | 0.52<br><i>p &lt; .001</i> | 0.72<br><i>p &lt; .001</i> | 0.23<br><i>5.79E-02</i>  | 0.91<br><i>p &lt; .001</i> | 0.47<br><i>p &lt; .001</i> | 0.95<br><i>p &lt; .001</i> | 1.00      |
|              | <b>TPSA</b>                | <b>nHAcc</b>               | <b>nHDon</b>             | <b>PHI</b>                 | <b>NAR</b>                 | <b>nC</b>                  | <b>MW</b> |

Table S11. Pearson's Correlation Coefficients and p values for warhead descriptor correlations

|              |                            |                            |                            |                            |                            |                            |           |
|--------------|----------------------------|----------------------------|----------------------------|----------------------------|----------------------------|----------------------------|-----------|
| <b>TPSA</b>  | 1.00                       |                            |                            |                            |                            |                            |           |
| <b>nHAcc</b> | 0.81<br><i>p &lt; .001</i> | 1.00                       |                            |                            |                            |                            |           |
| <b>nHDon</b> | 0.77<br><i>p &lt; .001</i> | 0.55<br><i>p &lt; .001</i> | 1.00                       |                            |                            |                            |           |
| <b>PHI</b>   | 0.50<br><i>p &lt; .001</i> | 0.68<br><i>p &lt; .001</i> | 0.20<br><i>p &lt; .001</i> | 1.00                       |                            |                            |           |
| <b>NAR</b>   | 0.14<br><i>1.75E-02</i>    | 0.22<br><i>7.48E-02</i>    | -0.05<br><i>4.16E-01</i>   | 0.18<br><i>1.57E-03</i>    | 1.00                       |                            |           |
| <b>nC</b>    | 0.24<br><i>p &lt; .001</i> | 0.46<br><i>p &lt; .001</i> | -0.09<br><i>1.07E-01</i>   | 0.83<br><i>p &lt; .001</i> | 0.46<br><i>p &lt; .001</i> | 1.00                       |           |
| <b>MW</b>    | 0.59<br><i>p &lt; .001</i> | 0.75<br><i>p &lt; .001</i> | 0.23<br><i>p &lt; .001</i> | 0.90<br><i>p &lt; .001</i> | 0.39<br><i>p &lt; .001</i> | 0.87<br><i>p &lt; .001</i> | 1.00      |
|              | <b>TPSA</b>                | <b>nHAcc</b>               | <b>nHDon</b>               | <b>PHI</b>                 | <b>NAR</b>                 | <b>nC</b>                  | <b>MW</b> |

Table S12. Pearson's Correlation Coefficients and p values for linker descriptor correlations

|              |                         |                          |                         |                          |                         |                         |           |
|--------------|-------------------------|--------------------------|-------------------------|--------------------------|-------------------------|-------------------------|-----------|
| <b>TPSA</b>  | 1.00                    |                          |                         |                          |                         |                         |           |
| <b>nHAcc</b> | 0.93<br><i>p</i> < .001 | 1.00                     |                         |                          |                         |                         |           |
| <b>nHDon</b> | 0.62<br><i>p</i> < .001 | 0.43<br><i>p</i> < .001  | 1.00                    |                          |                         |                         |           |
| <b>PHI</b>   | 0.54<br><i>p</i> < .001 | 0.67<br><i>p</i> < .001  | 0.13<br><i>3.02E-04</i> | 1.00                     |                         |                         |           |
| <b>NAR</b>   | 0.30<br><i>p</i> < .001 | 0.224<br><i>p</i> < .001 | 0.03<br><i>3.68E-01</i> | -0.24<br><i>p</i> < .001 | 1.00                    |                         |           |
| <b>nC</b>    | 0.56<br><i>p</i> < .001 | 0.65<br><i>p</i> < .001  | 0.11<br><i>2.75E-03</i> | 0.68<br><i>p</i> < .001  | 0.41<br><i>p</i> < .001 | 1.00                    |           |
| <b>MW</b>    | 0.78<br><i>p</i> < .001 | 0.87<br><i>p</i> < .001  | 0.24<br><i>p</i> < .001 | 0.75<br><i>p</i> < .001  | 0.37<br><i>p</i> < .001 | 0.94<br><i>p</i> < .001 | 1.00      |
|              | <b>TPSA</b>             | <b>nHAcc</b>             | <b>nHDon</b>            | <b>PHI</b>               | <b>NAR</b>              | <b>nC</b>               | <b>MW</b> |

Table S13. Pearson's Correlation Coefficients and p values for PROTAC descriptor correlations.

|              |                             |                          |                         |                         |                         |                         |           |
|--------------|-----------------------------|--------------------------|-------------------------|-------------------------|-------------------------|-------------------------|-----------|
| <b>TPSA</b>  | 1.00                        |                          |                         |                         |                         |                         |           |
| <b>nHAcc</b> | 0.76<br><i>p</i> < .001     | 1.00                     |                         |                         |                         |                         |           |
| <b>nHDon</b> | 0.59<br><i>p</i> < .001     | 0.30<br><i>p</i> < .001  | 1.00                    |                         |                         |                         |           |
| <b>PHI</b>   | 0.62<br><i>p</i> < .001     | 0.66<br><i>p</i> < .001  | 0.33<br><i>p</i> < .001 | 1.00                    |                         |                         |           |
| <b>NAR</b>   | 2.58E-01<br><i>p</i> < .001 | 0.071<br><i>1.08E-03</i> | 0.03<br><i>1.14E-01</i> | 0.16<br><i>p</i> < .001 | 1.00                    |                         |           |
| <b>nC</b>    | 0.50<br><i>p</i> < .001     | 0.52<br><i>p</i> < .001  | 0.16<br><i>p</i> < .001 | 0.83<br><i>p</i> < .001 | 0.47<br><i>p</i> < .001 | 1.00                    |           |
| <b>MW</b>    | 0.68<br><i>p</i> < .001     | 0.72<br><i>p</i> < .001  | 0.24<br><i>p</i> < .001 | 0.88<br><i>p</i> < .001 | 0.38<br><i>p</i> < .001 | 0.93<br><i>p</i> < .001 | 1.00      |
|              | <b>TPSA</b>                 | <b>nHAcc</b>             | <b>nHDon</b>            | <b>PHI</b>              | <b>NAR</b>              | <b>nC</b>               | <b>MW</b> |

Figure S1. Databases overlap (PROTAC-DB in grey, PROTACpedia in yellow)

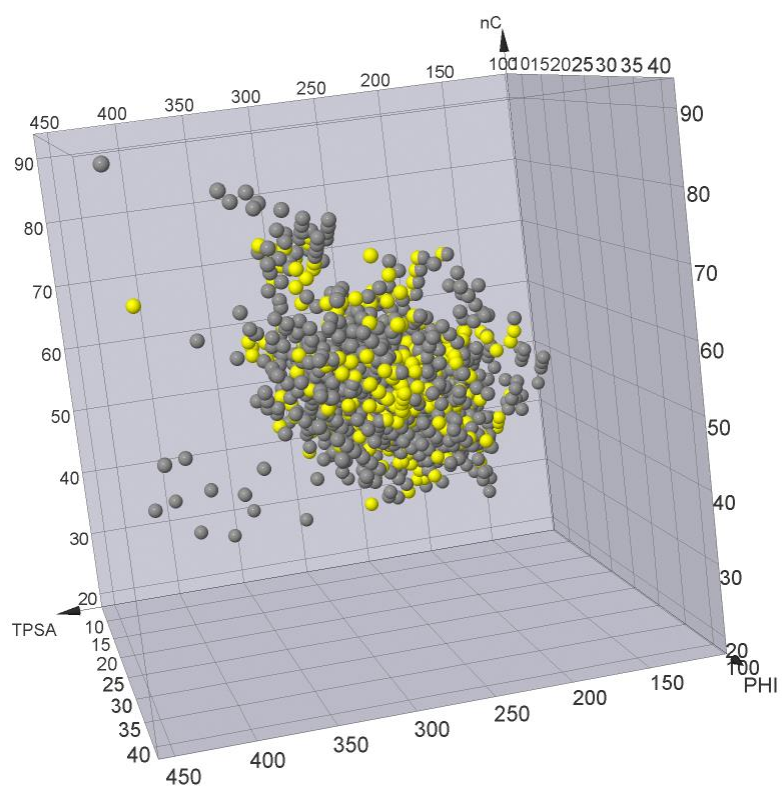

Figure S2. Investigated PROTAC chemical structures.

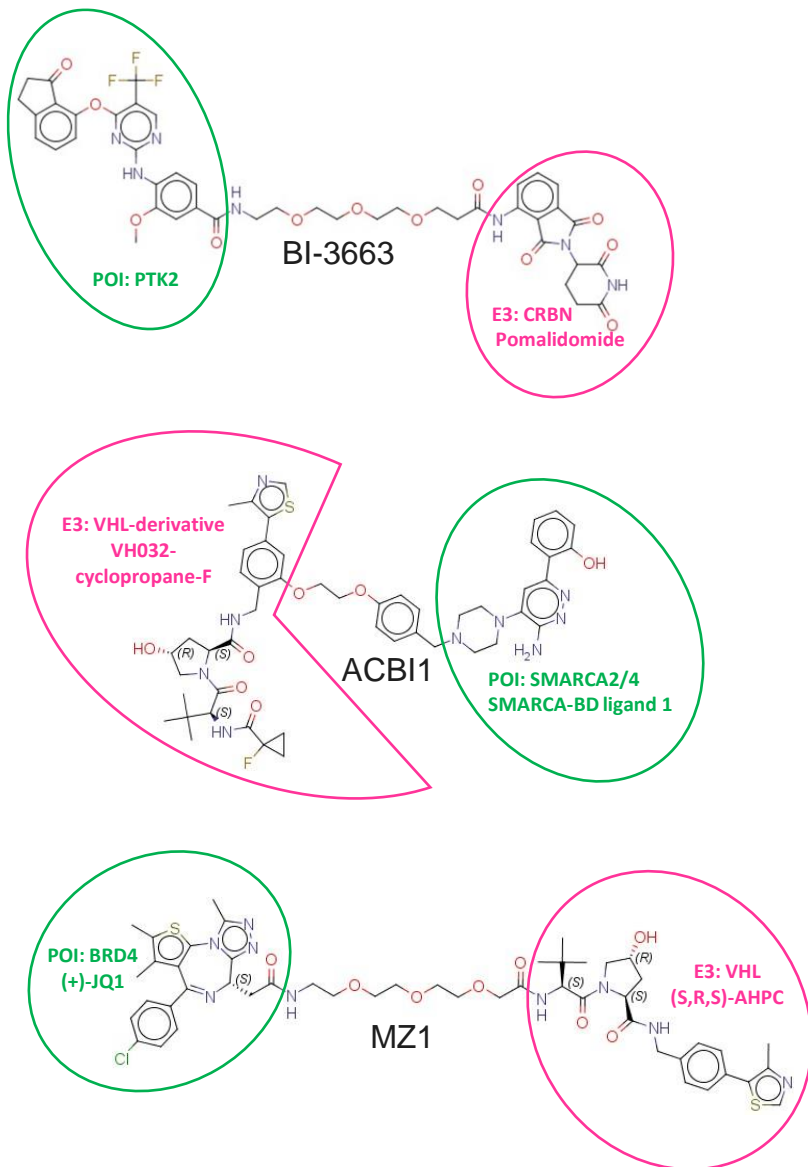

Figure S3. Box plots (same as Fig. 6) of the nonpolar descriptors for PROTACs and their building blocks with p-values obtained with ANOVA analysis. A) MW, B) nC and C) NAR.

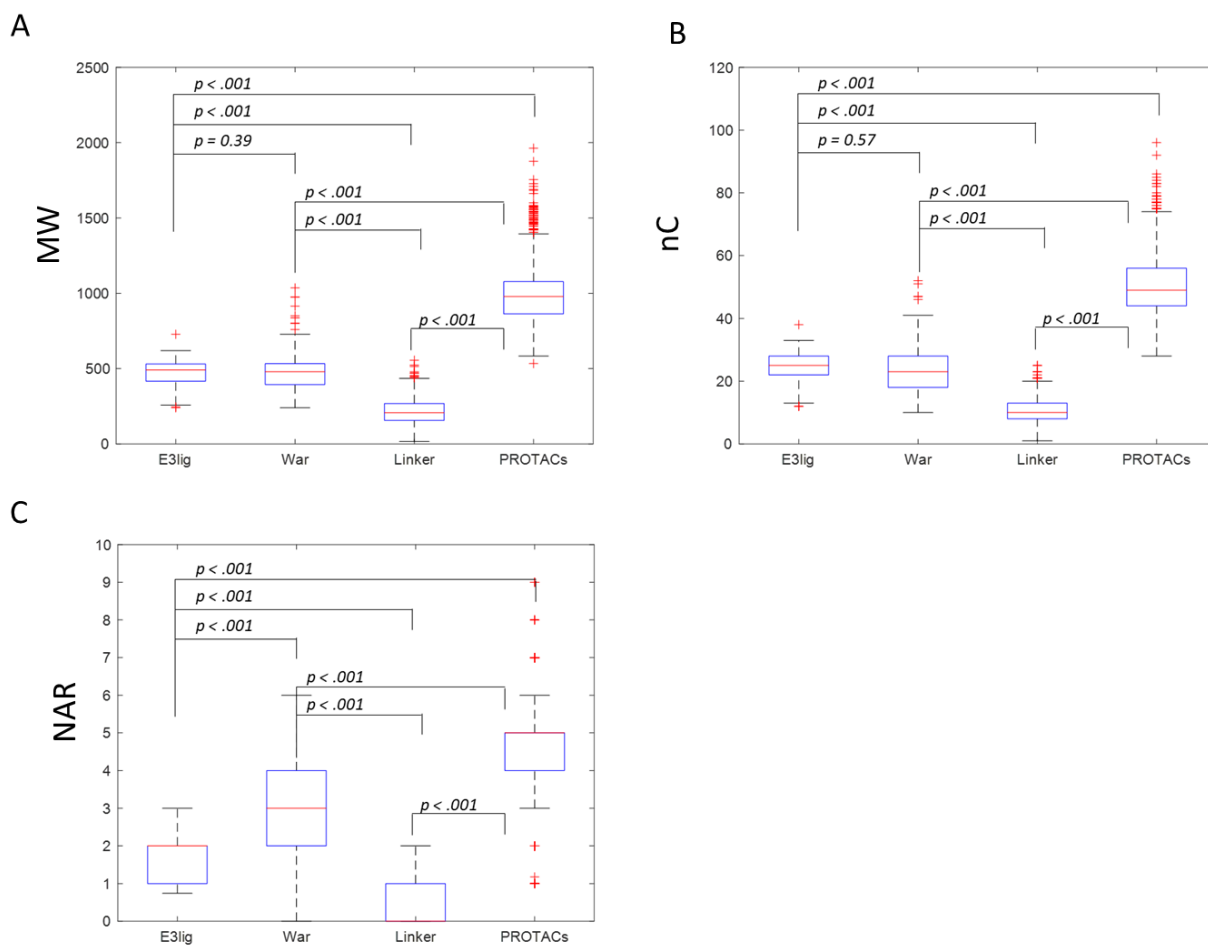

Figure S4. Box plot (same as Fig. 7) of the polar descriptors for PROTACs and their building blocks with p-values obtained with ANOVA analysis. A) TPSA, B) nHAcc and C) nHDon

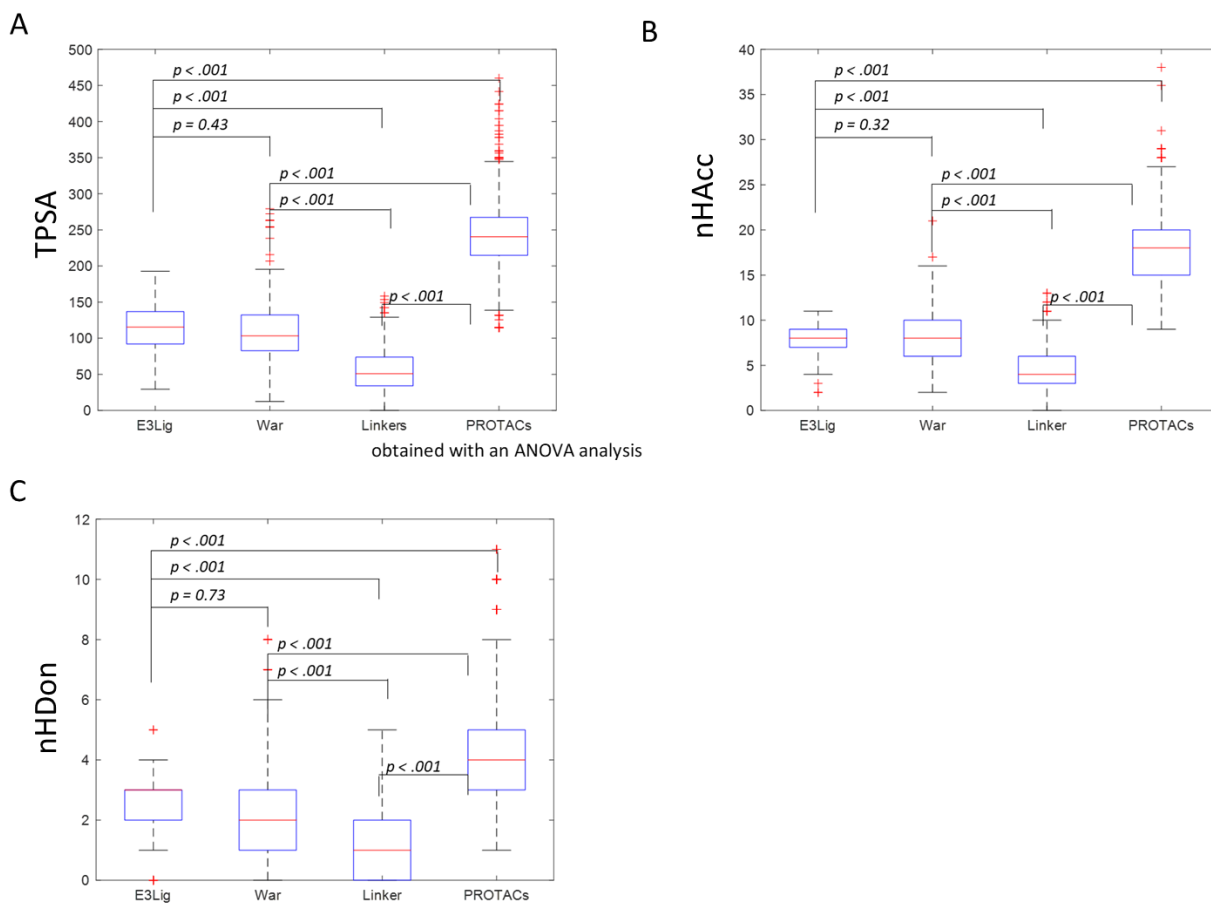

Figure S5. Box plot (same as Fig. 8) of the Kier's flexibility index (PHI) with p-values obtained with ANOVA analysis.

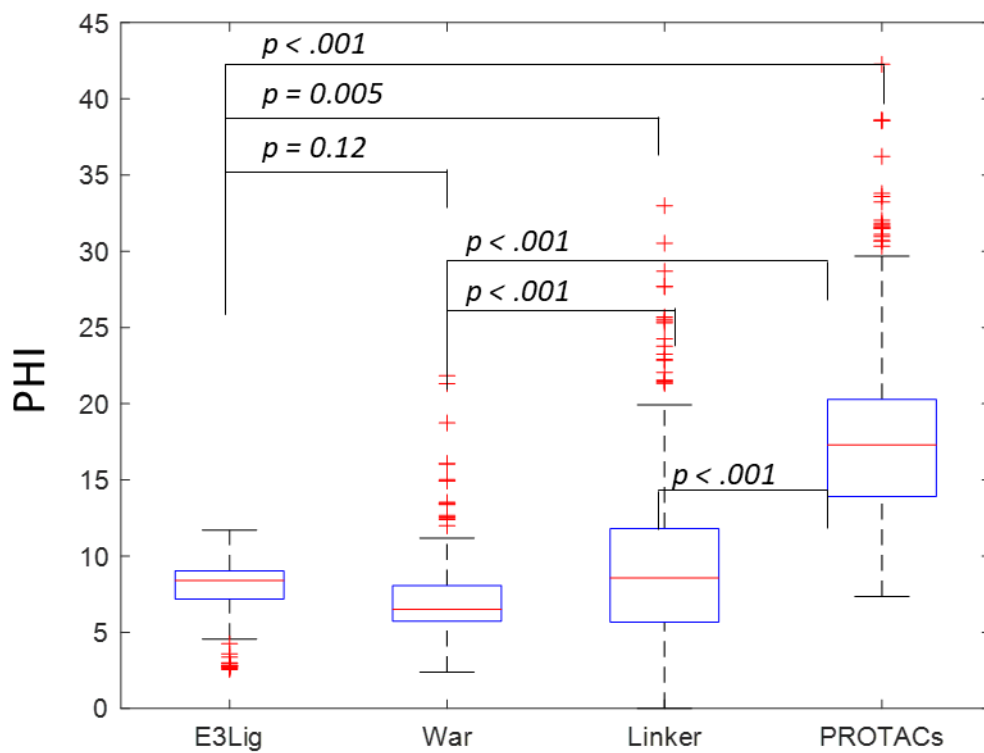



## Descriptors selection

The choice of the 7 descriptors can be also justified on the basis of statistical criteria as described below. We calculated with the same computational tools (alvaDesc and DataWarrior) an additional set of 229 count-based descriptors (data in Table S14). All the descriptors with constant values, standard deviation less than 0.0001 and with a percentage of 0 values greater than 70% were discarded obtaining a final set of 46 descriptors. The correlations between the 7 descriptors used in the paper and the additional 46 were evaluated (Table S15-S17). Then, Pearson coefficients allowed to classify the additional 46 descriptors in either hydrophobic or polar (no additional flexibility determinant was found). For example, nO showed the highest correlation with TPSA and thus it was considered a polar descriptor since TPSA is a polar descriptor. Using this strategy, we identified 17 additional hydrophobic and 3 polar descriptors. As shown in Tables S15-S17, most of these latter are significantly correlated with the set of seven descriptors that we selected to represent polarity and hydrophobicity and thus do not increase the amount of information. The remaining few descriptors, not correlated with the original pool, do not have any clear physicochemical meaning and thus are not in line with our approach based on physicochemical properties. For example, the percentage of heavy atoms is difficult to relate to hydrophobicity/polarity. Overall, these findings support that the selected 7 descriptors are the most relevant to cover the physicochemical properties of the datasets.

Table S14. Descriptors used in the paper and the additional count-base descriptors

| Name           | Description                                                         | Block                   | Included |
|----------------|---------------------------------------------------------------------|-------------------------|----------|
| MW             | molecular weight                                                    | Constitutional indices  | 1        |
| nC             | number of carbon atoms                                              | Constitutional indices  | 1        |
| Aromatic Rings | number of aromatic rings                                            | Functional group counts | 1        |
| TPSA(Tot)      | TPSA                                                                | Molecular Properties    | 1        |
| nHAcc          | number of acceptor atoms for H-bonds (N and O)                      | Functional group counts | 1        |
| nHDon          | number of donor atoms for H-bonds (N and O)                         | Functional group counts | 1        |
| PHI            | Kier flexibility index                                              | Topological Index       | 1        |
| AMW            | average molecular weight                                            | Constitutional indices  | 0        |
| Sv             | sum of atomic van der Waals volumes (scaled on Carbon atom)         | Constitutional indices  | 0        |
| Se             | sum of atomic Sanderson electronegativities (scaled on Carbon atom) | Constitutional indices  | 0        |
| Sp             | sum of atomic polarizabilities (scaled on Carbon atom)              | Constitutional indices  | 0        |
| Si             | sum of first ionization potentials (scaled on Carbon atom)          | Constitutional indices  | 0        |
| Mv             | mean atomic van der Waals volume (scaled on Carbon atom)            | Constitutional indices  | 0        |
| Me             | mean atomic Sanderson electronegativity (scaled on Carbon atom)     | Constitutional indices  | 0        |
| Mp             | mean atomic polarizability (scaled on Carbon atom)                  | Constitutional indices  | 0        |
| Mi             | mean first ionization potential (scaled on Carbon atom)             | Constitutional indices  | 0        |
| GD             | graph density                                                       | Constitutional indices  | 0        |
| nAT            | number of atoms                                                     | Constitutional indices  | 0        |
| nSK            | number of non-H atoms                                               | Constitutional indices  | 0        |
| nTA            | number of terminal atoms                                            | Constitutional indices  | 1        |
| nBT            | number of bonds                                                     | Constitutional indices  | 1        |
| nBO            | number of non-H bonds                                               | Constitutional indices  | 1        |
| nBM            | number of multiple bonds                                            | Constitutional indices  | 1        |
| SCBO           | sum of conventional bond orders (H-depleted)                        | Constitutional indices  | 1        |
| RBN            | number of rotatable bonds                                           | Constitutional indices  | 1        |
| RBF            | rotatable bond fraction                                             | Constitutional indices  | 1        |
| nDB            | number of double bonds                                              | Constitutional indices  | 1        |
| nTB            | number of triple bonds                                              | Constitutional indices  | 0        |
| nAB            | number of aromatic bonds                                            | Constitutional indices  | 0        |
| nH             | number of Hydrogen atoms                                            | Constitutional indices  | 0        |
| nN             | number of Nitrogen atoms                                            | Constitutional indices  | 1        |
| nO             | number of Oxygen atoms                                              | Constitutional indices  | 1        |
| nP             | number of Phosphorous atoms                                         | Constitutional indices  | 0        |
| nS             | number of Sulfur atoms                                              | Constitutional indices  | 0        |
| nF             | number of Fluorine atoms                                            | Constitutional indices  | 0        |
| nCL            | number of Chlorine atoms                                            | Constitutional indices  | 0        |
| nBR            | number of Bromine atoms                                             | Constitutional indices  | 0        |
| nI             | number of Iodine atoms                                              | Constitutional indices  | 0        |
| nB             | number of Boron atoms                                               | Constitutional indices  | 0        |
| nHM            | number of heavy atoms                                               | Constitutional indices  | 1        |
| nHet           | number of heteroatoms                                               | Constitutional indices  | 1        |
| nX             | number of halogen atoms                                             | Constitutional indices  | 1        |
| H%             | percentage of H atoms                                               | Constitutional indices  | 0        |
| C%             | percentage of C atoms                                               | Constitutional indices  | 1        |
| N%             | percentage of N atoms                                               | Constitutional indices  | 1        |
| O%             | percentage of O atoms                                               | Constitutional indices  | 1        |
| X%             | percentage of halogen atoms                                         | Constitutional indices  | 1        |
| nCsp3          | number of sp3 hybridized Carbon atoms                               | Constitutional indices  | 1        |
| nCsp2          | number of sp2 hybridized Carbon atoms                               | Constitutional indices  | 1        |
| nCsp           | number of sp hybridized Carbon atoms                                | Constitutional indices  | 1        |
| nStructures    | number of disconnected structures                                   | Constitutional indices  | 1        |
| totalcharge    | total charge                                                        | Constitutional indices  | 0        |
| nCIC           | number of rings (cyclomatic number)                                 | Ring descriptors        | 1        |
| nCIR           | number of circuits                                                  | Ring descriptors        | 1        |
| TRS            | total ring size                                                     | Ring descriptors        | 1        |
| Rperim         | ring perimeter                                                      | Ring descriptors        | 1        |
| Rbrid          | ring bridge count                                                   | Ring descriptors        | 1        |
| MCD            | molecular cyclized degree                                           | Ring descriptors        | 1        |
| RFD            | ring fusion density                                                 | Ring descriptors        | 1        |
| RCI            | ring complexity index                                               | Ring descriptors        | 1        |
| NRS            | number of ring systems                                              | Ring descriptors        | 1        |
| NNRS           | normalized number of ring systems                                   | Ring descriptors        | 1        |
| nR03           | number of 3-membered rings                                          | Ring descriptors        | 0        |
| nR04           | number of 4-membered rings                                          | Ring descriptors        | 0        |
| nR05           | number of 5-membered rings                                          | Ring descriptors        | 1        |
| nR06           | number of 6-membered rings                                          | Ring descriptors        | 1        |
| nR07           | number of 7-membered rings                                          | Ring descriptors        | 0        |
| nR08           | number of 8-membered rings                                          | Ring descriptors        | 0        |
| nR09           | number of 9-membered rings                                          | Ring descriptors        | 0        |

|          |                                          |                         |   |
|----------|------------------------------------------|-------------------------|---|
| nR10     | number of 10-membered rings              | Ring descriptors        | 0 |
| nR11     | number of 11-membered rings              | Ring descriptors        | 0 |
| nR12     | number of 12-membered rings              | Ring descriptors        | 0 |
| nBnz     | number of benzene-like rings             | Ring descriptors        | 0 |
| ARR      | aromatic ratio                           | Ring descriptors        | 0 |
| D/Dtr03  | distance/detour ring index of order 3    | Ring descriptors        | 0 |
| D/Dtr04  | distance/detour ring index of order 4    | Ring descriptors        | 0 |
| D/Dtr05  | distance/detour ring index of order 5    | Ring descriptors        | 0 |
| D/Dtr06  | distance/detour ring index of order 6    | Ring descriptors        | 0 |
| D/Dtr07  | distance/detour ring index of order 7    | Ring descriptors        | 0 |
| D/Dtr08  | distance/detour ring index of order 8    | Ring descriptors        | 0 |
| D/Dtr09  | distance/detour ring index of order 9    | Ring descriptors        | 0 |
| D/Dtr10  | distance/detour ring index of order 10   | Ring descriptors        | 0 |
| D/Dtr11  | distance/detour ring index of order 11   | Ring descriptors        | 0 |
| D/Dtr12  | distance/detour ring index of order 12   | Ring descriptors        | 0 |
| nCp      | number of terminal primary C(sp3)        | Functional group counts | 0 |
| nCs      | number of total secondary C(sp3)         | Functional group counts | 0 |
| nCt      | number of total tertiary C(sp3)          | Functional group counts | 0 |
| nCq      | number of total quaternary C(sp3)        | Functional group counts | 0 |
| nCrs     | number of ring secondary C(sp3)          | Functional group counts | 0 |
| nCrt     | number of ring tertiary C(sp3)           | Functional group counts | 0 |
| nCrq     | number of ring quaternary C(sp3)         | Functional group counts | 0 |
| nCar     | number of aromatic C(sp2)                | Functional group counts | 0 |
| nCbH     | number of unsubstituted benzene C(sp2)   | Functional group counts | 0 |
| nCb-     | number of substituted benzene C(sp2)     | Functional group counts | 0 |
| nCconj   | number of non-aromatic conjugated C(sp2) | Functional group counts | 0 |
| nR=Cp    | number of terminal primary C(sp2)        | Functional group counts | 0 |
| nR=Cs    | number of aliphatic secondary C(sp2)     | Functional group counts | 0 |
| nR=Ct    | number of aliphatic tertiary C(sp2)      | Functional group counts | 0 |
| n=C=     | number of allenes groups                 | Functional group counts | 0 |
| nR#CH/X  | number of terminal C(sp)                 | Functional group counts | 0 |
| nR#C-    | number of non-terminal C(sp)             | Functional group counts | 0 |
| nROCN    | number of cyanates (aliphatic)           | Functional group counts | 0 |
| nArOCN   | number of cyanates (aromatic)            | Functional group counts | 0 |
| nRNCO    | number of isocyanates (aliphatic)        | Functional group counts | 0 |
| nArNCO   | number of isocyanates (aromatic)         | Functional group counts | 0 |
| nRSCN    | number of thiocyanates (aliphatic)       | Functional group counts | 0 |
| nArSCN   | number of thiocyanates (aromatic)        | Functional group counts | 0 |
| nRNCS    | number of isothiocyanates (aliphatic)    | Functional group counts | 0 |
| nArNCS   | number of isothiocyanates (aromatic)     | Functional group counts | 0 |
| nRCOOH   | number of carboxylic acids (aliphatic)   | Functional group counts | 0 |
| nArCOOH  | number of carboxylic acids (aromatic)    | Functional group counts | 0 |
| nRCOOR   | number of esters (aliphatic)             | Functional group counts | 0 |
| nArCOOR  | number of esters (aromatic)              | Functional group counts | 0 |
| nRCONH2  | number of primary amides (aliphatic)     | Functional group counts | 0 |
| nArCONH2 | number of primary amides (aromatic)      | Functional group counts | 0 |
| nRCONHR  | number of secondary amides (aliphatic)   | Functional group counts | 0 |
| nArCONHR | number of secondary amides (aromatic)    | Functional group counts | 0 |
| nRCONR2  | number of tertiary amides (aliphatic)    | Functional group counts | 0 |
| nArCONR2 | number of tertiary amides (aromatic)     | Functional group counts | 0 |
| nROCON   | number of (thio-) carbamates (aliphatic) | Functional group counts | 0 |
| nArOCON  | number of (thio-) carbamates (aromatic)  | Functional group counts | 0 |
| nRCOX    | number of acyl halogenides (aliphatic)   | Functional group counts | 0 |
| nArCOX   | number of acyl halogenides (aromatic)    | Functional group counts | 0 |
| nRCSOH   | number of thioacids (aliphatic)          | Functional group counts | 0 |
| nArCSOH  | number of thioacids (aromatic)           | Functional group counts | 0 |
| nRCSOH   | number of dithioacids (aliphatic)        | Functional group counts | 0 |
| nArCSSH  | number of dithioacids (aromatic)         | Functional group counts | 0 |
| nRCOSR   | number of thioesters (aliphatic)         | Functional group counts | 0 |
| nArCOSR  | number of thioesters (aromatic)          | Functional group counts | 0 |
| nRCSSR   | number of dithioesters (aliphatic)       | Functional group counts | 0 |
| nArCSSR  | number of dithioesters (aromatic)        | Functional group counts | 0 |
| nRCHO    | number of aldehydes (aliphatic)          | Functional group counts | 0 |
| nArCHO   | number of aldehydes (aromatic)           | Functional group counts | 0 |
| nRCO     | number of ketones (aliphatic)            | Functional group counts | 0 |
| nArCO    | number of ketones (aromatic)             | Functional group counts | 0 |
| nCONN    | number of urea (-thio) derivatives       | Functional group counts | 0 |
| nC=O(O)2 | number of carbonate (-thio) derivatives  | Functional group counts | 0 |
| nN=C-N<  | number of amidine derivatives            | Functional group counts | 0 |
| nC(=N)N2 | number of guanidine derivatives          | Functional group counts | 0 |
| nRC=N    | number of imines (aliphatic)             | Functional group counts | 0 |
| nArC=N   | number of imines (aromatic)              | Functional group counts | 0 |

|               |                                          |                         |   |
|---------------|------------------------------------------|-------------------------|---|
| nRCNO         | number of oximes (aliphatic)             | Functional group counts | 0 |
| nArCNO        | number of oximes (aromatic)              | Functional group counts | 0 |
| nRNH2         | number of primary amines (aliphatic)     | Functional group counts | 0 |
| nArNH2        | number of primary amines (aromatic)      | Functional group counts | 0 |
| nRNHR         | number of secondary amines (aliphatic)   | Functional group counts | 0 |
| nArNHR        | number of secondary amines (aromatic)    | Functional group counts | 0 |
| nRNR2         | number of tertiary amines (aliphatic)    | Functional group counts | 0 |
| nArNR2        | number of tertiary amines (aromatic)     | Functional group counts | 0 |
| nN-N          | number of N hydrazines                   | Functional group counts | 0 |
| nN=N          | number of N azo-derivatives              | Functional group counts | 0 |
| nRCN          | number of nitriles (aliphatic)           | Functional group counts | 0 |
| nArCN         | number of nitriles (aromatic)            | Functional group counts | 0 |
| nN+           | number of positively charged N           | Functional group counts | 0 |
| nNq           | number of quaternary N                   | Functional group counts | 0 |
| nRNHO         | number of hydroxylamines (aliphatic)     | Functional group counts | 0 |
| nArNHO        | number of hydroxylamines (aromatic)      | Functional group counts | 0 |
| nRNNOx        | number of N-nitroso groups (aliphatic)   | Functional group counts | 0 |
| nArNNOx       | number of N-nitroso groups (aromatic)    | Functional group counts | 0 |
| nRNO          | number of nitroso groups (aliphatic)     | Functional group counts | 0 |
| nArNO         | number of nitroso groups (aromatic)      | Functional group counts | 0 |
| nRNO2         | number of nitro groups (aliphatic)       | Functional group counts | 0 |
| nArNO2        | number of nitro groups (aromatic)        | Functional group counts | 0 |
| nN(CO)2       | number of imides (-thio)                 | Functional group counts | 0 |
| nC=N-N<       | number of hydrazones                     | Functional group counts | 0 |
| nROH          | number of hydroxyl groups                | Functional group counts | 0 |
| nArOH         | number of aromatic hydroxyls             | Functional group counts | 0 |
| nOHp          | number of primary alcohols               | Functional group counts | 0 |
| nOHs          | number of secondary alcohols             | Functional group counts | 0 |
| nOht          | number of tertiary alcohols              | Functional group counts | 0 |
| nROR          | number of ethers (aliphatic)             | Functional group counts | 1 |
| nArOR         | number of ethers (aromatic)              | Functional group counts | 0 |
| nROX          | number of hypohalogenides (aliphatic)    | Functional group counts | 0 |
| nArOX         | number of hypohalogenides (aromatic)     | Functional group counts | 0 |
| nO(C=O)2      | number of anhydrides (-thio)             | Functional group counts | 0 |
| nH2O          | number of water molecules                | Functional group counts | 0 |
| nSH           | number of thiols                         | Functional group counts | 0 |
| nC=S          | number of thioketones                    | Functional group counts | 0 |
| nRSR          | number of sulfides                       | Functional group counts | 0 |
| nRSSR         | number of disulfides                     | Functional group counts | 0 |
| nSO           | number of sulfoxides                     | Functional group counts | 0 |
| nS(=O)2       | number of sulfones                       | Functional group counts | 0 |
| nSOH          | number of sulfenic (thio-) acids         | Functional group counts | 0 |
| nSOOH         | number of sulfinic (thio-/dithio-) acids | Functional group counts | 0 |
| nSO2OH        | number of sulfonic (thio-/dithio-) acids | Functional group counts | 0 |
| nSO3OH        | number of sulfuric (thio-/dithio-) acids | Functional group counts | 0 |
| nSO2          | number of sulfites (thio-/dithio-)       | Functional group counts | 0 |
| nSO3          | number of sulfonates (thio-/dithio-)     | Functional group counts | 0 |
| nSO4          | number of sulfates (thio-/dithio-)       | Functional group counts | 0 |
| nSO2N         | number of sulfonamides (thio-/dithio-)   | Functional group counts | 0 |
| nPO3          | number of phosphites/thiophosphites      | Functional group counts | 0 |
| nPO4          | number of phosphates/thiophosphates      | Functional group counts | 0 |
| nPR3          | number of phosphanes                     | Functional group counts | 0 |
| nP(=O)O2R     | number of phosphonates (thio-)           | Functional group counts | 0 |
| nP(=O)R3/nPR5 | number of phosphoranes (thio-)           | Functional group counts | 0 |
| nCH2RX        | number of CH2RX                          | Functional group counts | 0 |
| nCHR2X        | number of CHR2X                          | Functional group counts | 0 |
| nCR3X         | number of CR3X                           | Functional group counts | 0 |
| nR=CHX        | number of R=CHX                          | Functional group counts | 0 |
| nR=CRX        | number of R=CRX                          | Functional group counts | 0 |
| nR#CX         | number of R#CX                           | Functional group counts | 0 |
| nCHRX2        | number of CHRX2                          | Functional group counts | 0 |
| nCR2X2        | number of CR2X2                          | Functional group counts | 0 |
| nR=CX2        | number of R=CX2                          | Functional group counts | 0 |
| nCRX3         | number of CRX3                           | Functional group counts | 0 |
| nArX          | number of X on aromatic ring             | Functional group counts | 0 |
| nCXr          | number of X on ring C(sp3)               | Functional group counts | 0 |
| nCXr=         | number of X on ring C(sp2)               | Functional group counts | 0 |
| nCconjX       | number of X on exo-conjugated C          | Functional group counts | 0 |
| nAziridines   | number of Aziridines                     | Functional group counts | 0 |
| nOxiranes     | number of Oxiranes                       | Functional group counts | 0 |
| nThiranes     | number of Thiranes                       | Functional group counts | 0 |
| nAzetidines   | number of Azetidines                     | Functional group counts | 0 |

|                |                                             |                         |   |
|----------------|---------------------------------------------|-------------------------|---|
| nOxetanes      | number of Oxetanes                          | Functional group counts | 0 |
| nThioethanes   | number of Thioethanes                       | Functional group counts | 0 |
| nBeta-Lactams  | number of Beta-Lactams                      | Functional group counts | 0 |
| nPyrrolidines  | number of Pyrrolidines                      | Functional group counts | 0 |
| nOxolanes      | number of Oxolanes                          | Functional group counts | 0 |
| nTH-Thiophenes | number of tetrahydro-thiophenes             | Functional group counts | 0 |
| nPyrroles      | number of Pyrroles                          | Functional group counts | 0 |
| nPyrazoles     | number of Pyrazoles                         | Functional group counts | 0 |
| nImidazoles    | number of Imidazoles                        | Functional group counts | 0 |
| nFuranes       | number of Furanes                           | Functional group counts | 0 |
| nThiophenes    | number of Thiophenes                        | Functional group counts | 0 |
| nOxazoles      | number of Oxazoles                          | Functional group counts | 0 |
| nIsoxazoles    | number of Isoxazoles                        | Functional group counts | 0 |
| nThiazoles     | number of Thiazoles                         | Functional group counts | 0 |
| nIsothiazoles  | number of Isothiazoles                      | Functional group counts | 0 |
| nTriazoles     | number of Triazoles                         | Functional group counts | 0 |
| nPyridines     | number of Pyridines                         | Functional group counts | 0 |
| nPyridazines   | number of Pyridazines                       | Functional group counts | 0 |
| nPyrimidines   | number of Pyrimidines                       | Functional group counts | 0 |
| nPyrazines     | number of Pyrazines                         | Functional group counts | 0 |
| n135-Triazines | number of 1-3-5-Triazines                   | Functional group counts | 0 |
| n124-Triazines | number of 1-2-4-Triazines                   | Functional group counts | 0 |
| nHDon          | number of donor atoms for H-bonds (N and O) | Functional group counts | 1 |

---

Table S15. Additional descriptors correlated with hydrophobicity descriptors used in the paper (Pearson coefficient and p-values)

|            | nTA                    | nBT                    | nBO                    | SCBO                   | nCsp3                  | nCsp2                  | nCsp                   | nBM                    | RBN                    | nDB                    | nCIC                   | nCIR                   | TRS                    | Rperim                 | NRS                    | nR06                   | nHM                    |
|------------|------------------------|------------------------|------------------------|------------------------|------------------------|------------------------|------------------------|------------------------|------------------------|------------------------|------------------------|------------------------|------------------------|------------------------|------------------------|------------------------|------------------------|
| <b>MW</b>  | 0.89<br><i>p</i> <.001 | 1.00<br><i>p</i> <.001 | 1.00<br><i>p</i> <.001 | 0.99<br><i>p</i> <.001 | 0.84<br><i>p</i> <.001 | 0.95<br><i>p</i> <.001 | 0.93<br><i>p</i> <.001 | 0.91<br><i>p</i> <.001 | 0.88<br><i>p</i> <.001 | 0.94<br><i>p</i> <.001 | 0.91<br><i>p</i> <.001 | 0.82<br><i>p</i> <.001 | 0.91<br><i>p</i> <.001 | 0.93<br><i>p</i> <.001 | 0.93<br><i>p</i> <.001 | 0.86<br><i>p</i> <.001 | 1.00<br><i>p</i> <.001 |
| <b>nC</b>  | 0.88<br><i>p</i> <.001 | 0.99<br><i>p</i> <.001 | 0.99<br><i>p</i> <.001 | 0.99<br><i>p</i> <.001 | 0.84<br><i>p</i> <.001 | 0.95<br><i>p</i> <.001 | 0.94<br><i>p</i> <.001 | 0.91<br><i>p</i> <.001 | 0.88<br><i>p</i> <.001 | 0.94<br><i>p</i> <.001 | 0.92<br><i>p</i> <.001 | 0.82<br><i>p</i> <.001 | 0.92<br><i>p</i> <.001 | 0.93<br><i>p</i> <.001 | 0.94<br><i>p</i> <.001 | 0.86<br><i>p</i> <.001 | 0.99<br><i>p</i> <.001 |
| <b>NAR</b> | 0.69<br><i>p</i> <.001 | 0.88<br><i>p</i> <.001 | 0.88<br><i>p</i> <.001 | 0.90<br><i>p</i> <.001 | 0.56<br><i>p</i> <.001 | 0.90<br><i>p</i> <.001 | 0.79<br><i>p</i> <.001 | 0.95<br><i>p</i> <.001 | 0.75<br><i>p</i> <.001 | 0.90<br><i>p</i> <.001 | 0.92<br><i>p</i> <.001 | 0.87<br><i>p</i> <.001 | 0.92<br><i>p</i> <.001 | 0.92<br><i>p</i> <.001 | 0.91<br><i>p</i> <.001 | 0.81<br><i>p</i> <.001 | 0.87<br><i>p</i> <.001 |

Table S16. Additional descriptors correlated with polarity descriptors used in the paper (Pearson coefficient and p-values)

|                    | nN                     | nO                     | nHet                   |
|--------------------|------------------------|------------------------|------------------------|
| <b>TPSA</b>        | 0.85<br><i>p</i> <.001 | 0.86<br><i>p</i> <.001 | 0.97<br><i>p</i> <.001 |
| <b>H-Acceptors</b> | 0.89<br><i>p</i> <.001 | 0.89<br><i>p</i> <.001 | 0.98<br><i>p</i> <.001 |
| <b>H-Donors</b>    | 0.68<br><i>p</i> <.001 | 0.69<br><i>p</i> <.001 | 0.78<br><i>p</i> <.001 |

Table S17. Additional descriptors which are not correlated with descriptors used in the paper (Pearson coefficient and p-values)

|                    | nX                     | C%                       | N%                      | O%                      | X%                     | nStructures              | nROR                   | Rbrid                  | MCD                    | RFD                     | RCI                    | RBF                    | NNRS                   | nR05                   |
|--------------------|------------------------|--------------------------|-------------------------|-------------------------|------------------------|--------------------------|------------------------|------------------------|------------------------|-------------------------|------------------------|------------------------|------------------------|------------------------|
| <b>MW</b>          | 0.47<br><i>p</i> <.001 | 0.00<br><i>7.80E-01</i>  | 0.08<br><i>8.20E-01</i> | -0.24<br><i>p</i> <.001 | 0.23<br><i>p</i> <.001 | 0.00<br><i>8.40E-01</i>  | 0.33<br><i>p</i> <.001 | 0.42<br><i>p</i> <.001 | 0.57<br><i>p</i> <.001 | 0.30<br><i>p</i> <.001  | 0.62<br><i>p</i> <.001 | 0.60<br><i>p</i> <.001 | 0.52<br><i>p</i> <.001 | 0.69<br><i>p</i> <.001 |
| <b>nC</b>          | 0.40<br><i>p</i> <.001 | 0.12<br><i>p</i> <.001   | 0.04<br><i>1.13E-02</i> | -0.28<br><i>p</i> <.001 | 0.17<br><i>p</i> <.001 | -0.01<br><i>6.28E-01</i> | 0.30<br><i>p</i> <.001 | 0.42<br><i>p</i> <.001 | 0.58<br><i>p</i> <.001 | 0.30<br><i>p</i> <.001  | 0.61<br><i>p</i> <.001 | 0.60<br><i>p</i> <.001 | 0.51<br><i>p</i> <.001 | 0.68<br><i>p</i> <.001 |
| <b>NAR</b>         | 0.33<br><i>p</i> <.001 | 0.08<br><i>1.64E-05</i>  | 0.21<br><i>p</i> <.001  | -0.39<br><i>p</i> <.001 | 0.18<br><i>p</i> <.001 | -0.01<br><i>5.42E-01</i> | 0.16<br><i>p</i> <.001 | 0.52<br><i>p</i> <.001 | 0.72<br><i>p</i> <.001 | 0.40<br><i>p</i> <.001  | 0.69<br><i>p</i> <.001 | 0.54<br><i>p</i> <.001 | 0.53<br><i>p</i> <.001 | 0.79<br><i>p</i> <.001 |
| <b>TPSA(Tot)</b>   | 0.35<br><i>p</i> <.001 | -0.17<br><i>p</i> <.001  | 0.18<br><i>p</i> <.001  | -0.13<br><i>p</i> <.001 | 0.14<br><i>p</i> <.001 | -0.01<br><i>7.70E-01</i> | 0.32<br><i>p</i> <.001 | 0.44<br><i>p</i> <.001 | 0.53<br><i>p</i> <.001 | 0.33<br><i>p</i> <.001  | 0.60<br><i>p</i> <.001 | 0.60<br><i>p</i> <.001 | 0.48<br><i>p</i> <.001 | 0.74<br><i>p</i> <.001 |
| <b>H-Acceptors</b> | 0.31<br><i>p</i> <.001 | -0.20<br><i>p</i> <.001  | 0.23<br><i>p</i> <.001  | -0.09<br><i>p</i> <.001 | 0.11<br><i>p</i> <.001 | 0.00<br><i>7.81E-01</i>  | 0.42<br><i>p</i> <.001 | 0.48<br><i>p</i> <.001 | 0.54<br><i>p</i> <.001 | 0.36<br><i>p</i> <.001  | 0.61<br><i>p</i> <.001 | 0.52<br><i>p</i> <.001 | 0.46<br><i>p</i> <.001 | 0.71<br><i>p</i> <.001 |
| <b>H-Donors</b>    | 0.28<br><i>p</i> <.001 | -0.15<br><i>p</i> <.001  | 0.17<br><i>p</i> <.001  | -0.12<br><i>p</i> <.001 | 0.14<br><i>p</i> <.001 | 0.00<br><i>8.67E-01</i>  | 0.09<br><i>p</i> <.001 | 0.29<br><i>p</i> <.001 | 0.41<br><i>p</i> <.001 | 0.23<br><i>p</i> <.001  | 0.49<br><i>p</i> <.001 | 0.67<br><i>p</i> <.001 | 0.41<br><i>p</i> <.001 | 0.57<br><i>p</i> <.001 |
| <b>PHI</b>         | 0.37<br><i>p</i> <.001 | -0.04<br><i>3.77E-02</i> | -0.17<br><i>p</i> <.001 | 0.07<br><i>3.54E-05</i> | 0.11<br><i>p</i> <.001 | 0.00<br><i>0.85</i>      | 0.58<br><i>p</i> <.001 | 0.15<br><i>p</i> <.001 | 0.16<br><i>p</i> <.001 | 0.04<br><i>1.79E-02</i> | 0.28<br><i>p</i> <.001 | 0.45<br><i>p</i> <.001 | 0.29<br><i>p</i> <.001 | 0.45<br><i>p</i> <.001 |
